# Supplementary material
Source: PubMed Central journal article supplement (PMC3020563)
Supplement: supp_77_2_400__1.pdf [file supp_77_2_400__1.pdf]

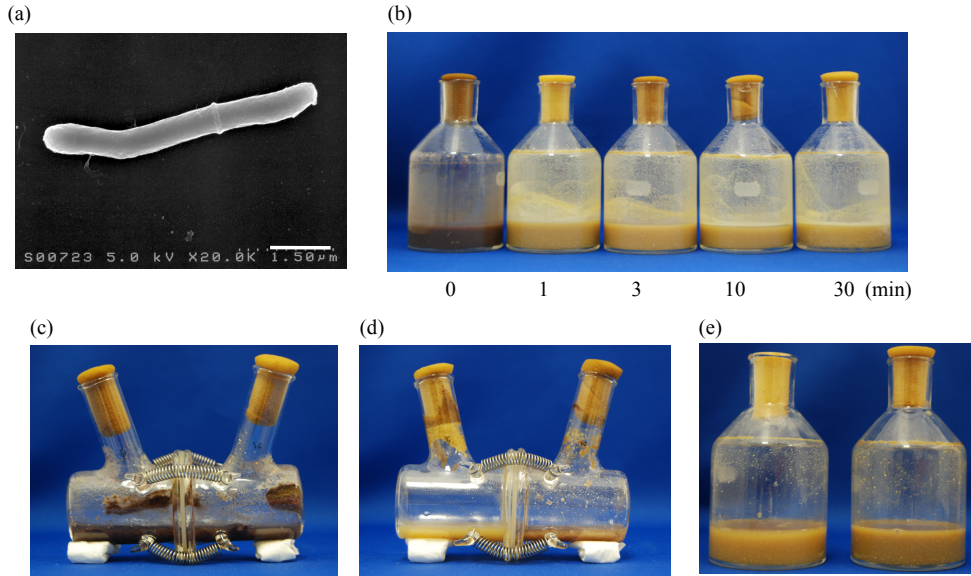

**Fig. S1** Scanning electron micrograph of *T. pulmonis* TP-B0596 (a), the liquid culture of *S. lividans* with *T. pulmonis* liquid-culture broth sterilized in an autoclave (b), Co-culture with regenerate cellulose membrane in a dialysis flask (c, d), and the addition of *T. pulmonis* cell wall fraction into *S. lividans* pure culture (e).

(a) Scanning electron micrograph of *T. pulmonis* TP-B0596. The bar represents 1 μm. (b) The liquid culture of *S. lividans* with *T. pulmonis* liquid-culture broth sterilized in an autoclave at 121°C for 0, 1, 3, 10, or 30 min. The cultures were grown at 30 °C for 7 days. (c) Co-culture of *T. pulmonis* and *S. lividans* in a dialysis flask without dialysis membrane (positive control). (d) Co-culture of *T. pulmonis* and *S. lividans* in a dialysis flask with regenerated cellulose membrane (pore size is about 50 kDa). *T. pulmonis* was grown in the left compartment and *S. lividans* in the right compartment at 30 °C for 7 days. (e) The addition of cell wall fraction into *S. lividans* pure culture (right), and no addition (left) at 30 °C for 7 days. The cell wall was prepared from a 500-ml culture of *T. pulmonis* pure culture.

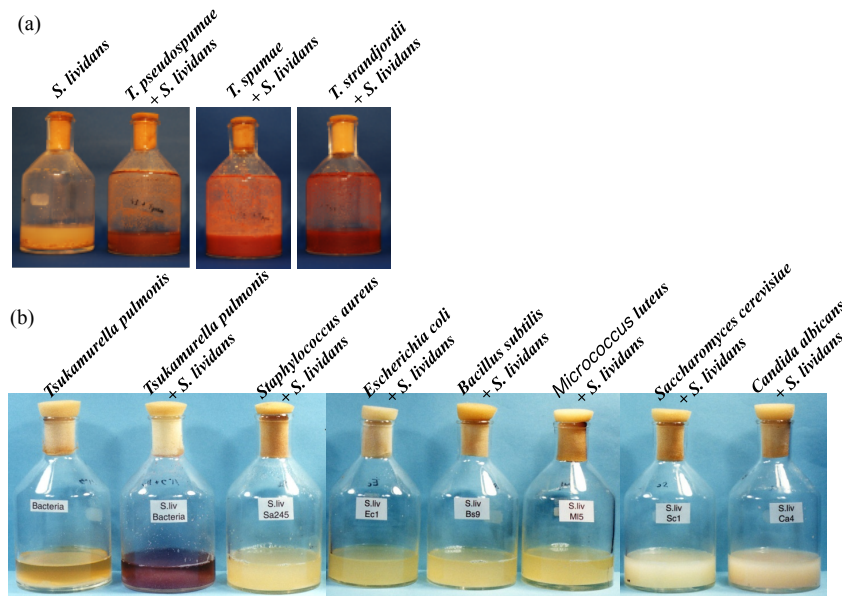

**Fig. S2** Co-culture of widely divergent microorganisms and *S. lividans*

(a) The combined cultures of *S. lividans* and *Tsukamurella* strains were grown at 30 °C for 7 days. The left side of the K-1 flask contains the pure culture of *S. lividans*. Red-pigment production was induced in the combined cultures of *S. lividans* with *T. pseudospumae*, *T. spumae* and *T. strandjordii*. (b) Widely divergent microorganisms and *S. lividans* were co-cultivated in A-3M medium at 30 °C for 7 days. The left side of the K-1 flask contains the pure culture of *T. pulmonis*.

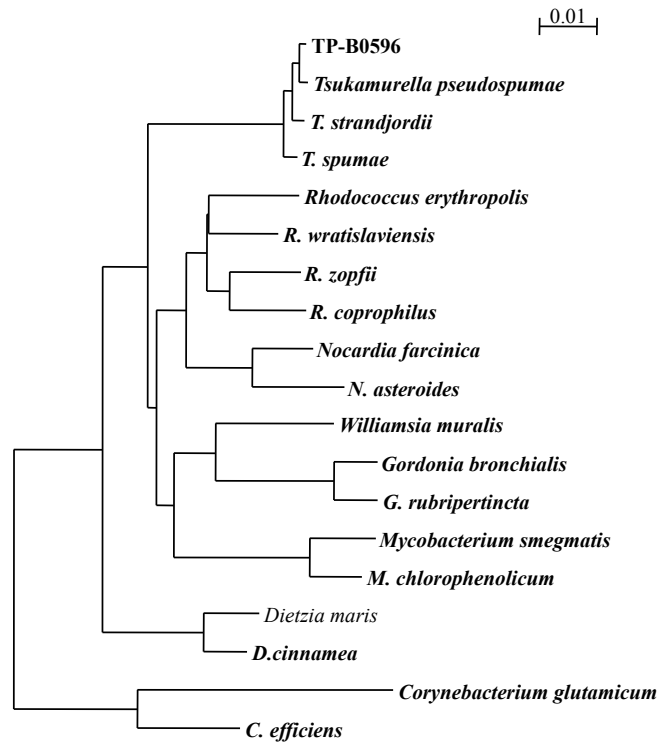

**Fig. S3 Phylogenetic tree based on 16S rRNA sequences of microorganisms used in this study.**  
 Species names in the bold type induced red-pigment formation in *S. lividans*. The bar represents 1% sequence divergence.

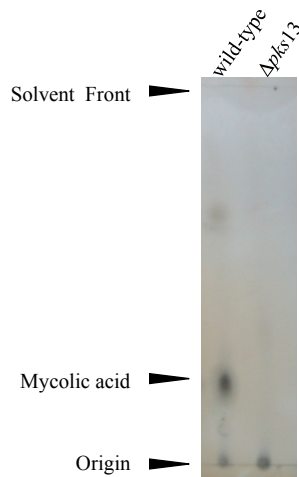

**Fig. S4 Mycolic acid detection in *C. glutamicum* wild-type and  $\Delta pks13$  strains**  
 Mycolic acid was extracted from *C. glutamicum* wild-type and  $\Delta pks13$  strains that were cultured in LB broth for 2 days. Methyl-esters of the extracted mycolic acids were subjected to thin-layer chromatography (TLC), and the plates were developed in *n*-hexane-diethylether (4:1) and soaked in 50% H<sub>2</sub>SO<sub>4</sub>.

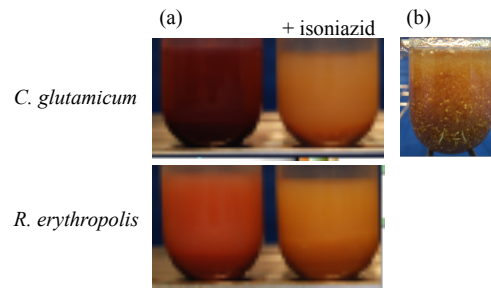

**Fig. S5 Addition of mycolic acid synthase inhibitors to co-culture of *S. lividans* with activator strains**

(a) Addition of mycolic acid biosynthetic inhibitor isoniazid to the co-culture of *S. lividans* with activator strains. Co-culture of *S. lividans* with *C. glutamicum* and *R. erythropolis* did not induce red-pigment production. (b) Addition of extracted mycolic acid of *C. glutamicum* to a pure culture of *S. lividans* did not induce red-pigment production.

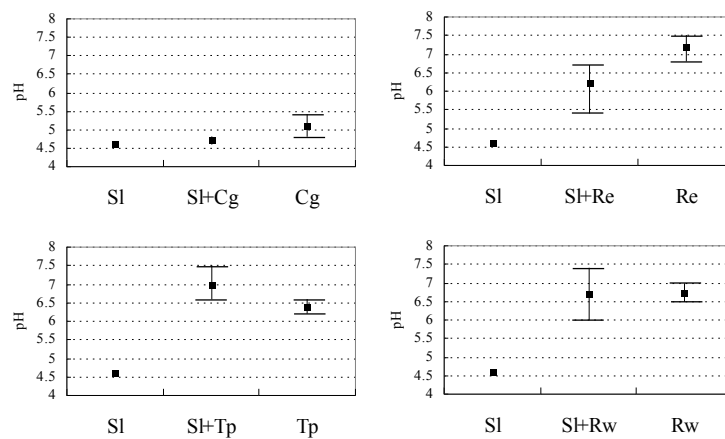

**Fig. S6 Measurement of pH of the whole broth of pure cultures and co-cultures.**

The pH values of both pure and co-cultures were measured 3 times and the average values were plotted. Cg, Re, Tp, Rw, and SI are abbreviations for *C. glutamicum*, *R. erythropolis*, *T. pulmonis*, *R. wrastrivaensis*, and *S. lividans* and indicate pure cultures of these microorganisms. Cg + SI, Re + SI, Tp + SI, and Rw + SI indicate co-cultures. The cultures were grown in A-3M medium at 30 °C for 7 days.

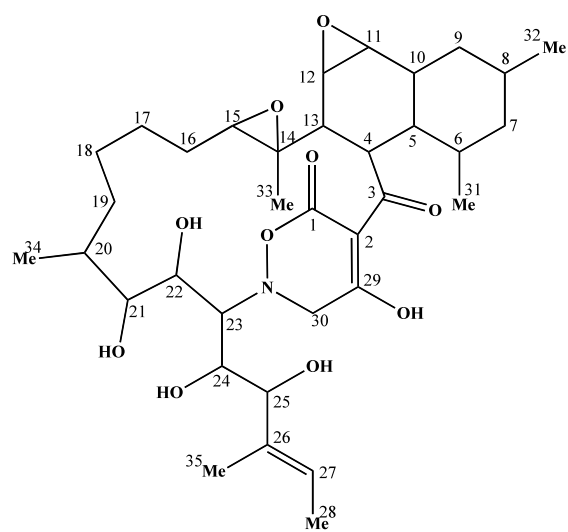

**Fig. S7 Determination of carbon positions in alchivemycin A**  
The numbers represent the carbon positions in alchivemycin A.

**Table S1**  
Nuclear magnetic resonance assignment data of Alchivemycin A

| Position | C (ppm) | H (ppm)                        | Type            |
|----------|---------|--------------------------------|-----------------|
| 1        | 176.61  |                                | C               |
| 2        | 105.28  |                                | C               |
| 3        | 201.30  |                                | C               |
| 4        | 36.79   | 4.72 (t, 10.9)                 | CH              |
| 5        | 38.72   | 2.25 (dm, 11.5)                | CH              |
| 6        | 39.35   | 1.67 (m)                       | CH              |
| 7        | 39.89   | 1.23 (m), 1.34 (q, 12.7)       | CH <sub>2</sub> |
| 8        | 34.68   | 1.58 (m)                       | CH              |
| 9        | 34.00   | 1.17 (q, 12.4), 1.67 (m)       | CH <sub>2</sub> |
| 10       | 40.36   | 2.19 (dm, 12.9)                | CH              |
| 11       | 58.70   | 3.11 (m)                       | CH              |
| 12       | 54.54   | 3.05 (d, 3.0)                  | CH              |
| 13       | 51.29   | 2.09 (d, 10.1)                 | CH              |
| 14       | 61.60   |                                | C               |
| 15       | 64.78   | 2.74 (d, 9.6)                  | CH              |
| 16       | 27.44   | 1.47 (m), 1.71 (m)             | CH <sub>2</sub> |
| 17       | 26.54   | 1.72 (m)                       | CH <sub>2</sub> |
| 18       | 28.03   | 1.33 (m), 1.58 (m)             | CH <sub>2</sub> |
| 19       | 34.72   | 1.57 (m), 1.62 (m)             | CH <sub>2</sub> |
| 20       | 36.16   | 1.67 (m)                       | CH              |
| 21       | 79.45   | 3.50 (dd, 1.4, 8.8)            | CH              |
| 22       | 75.32   | 4.30 (dd, 3.8, 8.7)            | CH              |
| 23       | 62.74   | 3.77 (dd, 1.9, 3.8)            | CH              |
| 24       | 71.76   | 4.42 (dd, 1.7, 8.1)            | CH              |
| 25       | 80.38   | 4.06 (d, 8.0)                  | CH              |
| 26       | 137.37  |                                | C               |
| 27       | 124.11  | 5.61 (q, 6.7)                  | CH              |
| 28       | 13.77   | 1.66 (d, 6.8)                  | CH <sub>3</sub> |
| 29       | 192.23  |                                | C               |
| 30       | 64.08   | 4.16 (d, 17.0), 4.31 (d, 17.1) | CH <sub>2</sub> |
| 31       | 22.07   | 0.81 (d, 7.3)                  | CH <sub>3</sub> |
| 32       | 23.25   | 1.02 (d, 6.5)                  | CH <sub>3</sub> |
| 33       | 15.30   | 1.28 (s)                       | CH <sub>3</sub> |
| 34       | 12.67   | 0.83 (d, 7.0)                  | CH <sub>3</sub> |
| 35       | 12.14   | 1.68 (s)                       | CH <sub>3</sub> |

**Table S2, The sample sources of isolated strains**

| Bacterial strain                                 | Source of isolation                                                 | reference |
|--------------------------------------------------|---------------------------------------------------------------------|-----------|
| <i>C. glutamicum</i> ATCC 13869                  | nature                                                              | (10)      |
| <i>C. efficiens</i> NBRC 100395 <sup>T</sup>     | soil                                                                | (2)       |
| <i>R. erythropolis</i> JCM3201 <sup>T</sup>      | soil                                                                | (4)       |
| <i>R. coprophilus</i> JCM3200 <sup>T</sup>       | lake mud                                                            | (1)       |
| <i>R. wratislaviensis</i> JCM9689 <sup>T</sup>   | soil                                                                | (5)       |
| <i>R. zopfii</i> JCM9919 <sup>T</sup>            | toluene-phenol bioreactor                                           | (14)      |
| <i>T. pulmonis</i> TP-B0596                      | soil                                                                | This work |
| <i>T. pseudospumae</i> JCM13375 <sup>T</sup>     | activated sludge foam                                               | (12)      |
| <i>T. spumae</i> JCM12608 <sup>T</sup>           | activated sewage sludge foam                                        | (11)      |
| <i>T. strandjordii</i> JCM11487 <sup>T</sup>     | blood from a 5-year-old girl with acute myelogenous leukemia        | (9)       |
| <i>G. rubripertincta</i> JCM3204 <sup>T</sup>    | ND                                                                  |           |
| <i>G. bronchialis</i> NBRC 16047 <sup>T</sup>    | sputa of patients with pulmonary disease                            | (4)       |
| <i>N. farcinica</i> JCM3088 <sup>T</sup>         | ND                                                                  |           |
| <i>N. asteroides</i> NBRC 15531 <sup>T</sup>     | soil or human infection                                             | (3)       |
| <i>M. smegmatis</i> NBRC 3082                    | syphilitic chancres                                                 | (7)       |
| <i>M. chlorophenicum</i> NBRC 15527 <sup>T</sup> | chlorophenol-contaminated lake sediment                             | (6)       |
| <i>W. muralis</i> JCM10676 <sup>T</sup>          | Non-water-damaged building material of a children's day care center | (8)       |
| <i>D. cinnamea</i> JCM13663 <sup>T</sup>         | perianal swab of a human with a bone marrow transplant              | (15)      |
| <i>D. maris</i> JCM6166 <sup>T</sup>             | soil                                                                | (13)      |

ND : Not described

1. **Cross, T. J. R. a. T.** 1977. *Rhodococcus coprophilus* sp. nov.: An Aerobic Nocardioform Actinomycete Belonging to the 'rhodochrous' Complex. *J Gen Microbiol* **100**:123-138.
2. **Fudou, R., Y. Jojima, A. Seto, K. Yamada, E. Kimura, T. Nakamatsu, A. Hiraishi, and S. Yamanaka.** 2002. *Corynebacterium efficiens* sp. nov., a glutamic-acid-producing species from soil and vegetables. *Int J Syst Evol Microbiol* **52**:1127-31.
3. **Goodfellow, M.** 1992. The Family Nocardiaceae, p. 1188-1213. *In* A. Balows, H. G. Truper, M. Dworkin, W. Harder, and K. H. Schleifer (ed.), *The Prokaryotes*, Second Edition. Springer-Verlag, New York.
4. **Goodfellow, M., and G. Alderson.** 1977. The actinomycete-genus *Rhodococcus*: a home for the "rhodochrous" complex. *J Gen Microbiol* **100**:99-122.
5. **Goodfellow, M., J. Chun, E. Stackebrandt, and R. M. Kroppenstedt.** 2002.

- Transfer of *Tsukamurella wratislaviensis* Goodfellow et al. 1995 to the genus *Rhodococcus* as *Rhodococcus wratislaviensis* comb. nov. *Int J Syst Evol Microbiol* **52**:749-55.
6. **Hagglblom, M. M., L. J. Nohynek, N. J. Palleroni, K. Kronqvist, E. L. Nurmiaho-Lassila, M. S. Salkinoja-Salonen, S. Klatte, R. M. Kroppenstedt, and M. M. Hagglblom.** 1994. Transfer of polychlorophenol-degrading *Rhodococcus chlorophenolicus* (Apajalahti et al. 1986) to the genus *Mycobacterium* as *Mycobacterium chlorophenolicum* comb. nov. *Int J Syst Bacteriol* **44**:485-93.
  7. **Hartmans, S., and J. A. de Bont.** 1992. The Genus *Mycobacterium*-Nonmedical, p. 1216-1237. *In* A. Balows, H. G. Truper, M. Dworkin, W. Harder, and K. H. Schleifer (ed.), *The Prokaryotes*, Second Edition. Springer-Verlag, New York.
  8. **Kampfer, P., M. A. Andersson, F. A. Rainey, R. M. Kroppenstedt, and M. Salkinoja-Salonen.** 1999. *Williamsia muralis* gen. nov., sp. nov., isolated from the indoor environment of a children's day care centre. *Int J Syst Bacteriol* **49 Pt 2**:681-7.
  9. **Kattar, M. M., B. T. Cookson, L. D. Carlson, S. K. Stiglich, M. A. Schwartz, T. T. Nguyen, R. Daza, C. K. Wallis, S. L. Yarfitz, and M. B. Coyle.** 2001. *Tsukamurella strandjordae* sp. nov., a proposed new species causing sepsis. *J Clin Microbiol* **39**:1467-76.
  10. **Liebl, W.** 1992. The Genus *Corynebacterium*-Nonmedical, p. 1157-1171. *In* A. Balows, H. G. Truper, M. Dworkin, W. Harder, and K. H. Schleifer (ed.), *The Prokaryotes*, Second Edition. Springer-Verlag, New York.
  11. **Nam, S. W., J. Chun, S. Kim, W. Kim, J. Zakrzewska-Czerwinska, and M. Goodfellow.** 2003. *Tsukamurella spumae* sp. nov., a novel actinomycete associated with foaming in activated sludge plants. *Syst Appl Microbiol* **26**:367-75.
  12. **Nam, S. W., W. Kim, J. Chun, and M. Goodfellow.** 2004. *Tsukamurella pseudospumae* sp. nov., a novel actinomycete isolated from activated sludge foam. *Int J Syst Evol Microbiol* **54**:1209-12.
  13. **Nesterenko O. A. , N. T. M., Kasumova S. A., Kvasnikov E. I., Batrakov S. G. .** 1982. *Rhodococcus luteus* nom. nov. and *Rhodococcus maris* nom.nov. *Int J Syst Bacteriol* **32**:1-14.
  14. **Stoecker, M. A., R. P. Herwig, and J. T. Staley.** 1994. *Rhodococcus zopfii* sp. nov., a toxicant-degrading bacterium. *Int J Syst Bacteriol* **44**:106-10.
  15. **Yassin, A. F., H. Hupfer, and K. P. Schaal.** 2006. *Dietzia cinnamea* sp. nov., a novel species isolated from a perianal swab of a patient with a bone marrow transplant. *Int J Syst Evol Microbiol* **56**:641-5.
